# Supplementary material
Source: PubMed Central journal article supplement (PMC9358425)
Supplement: mmc2.pdf [file mmc2.pdf]

### Weight Loss

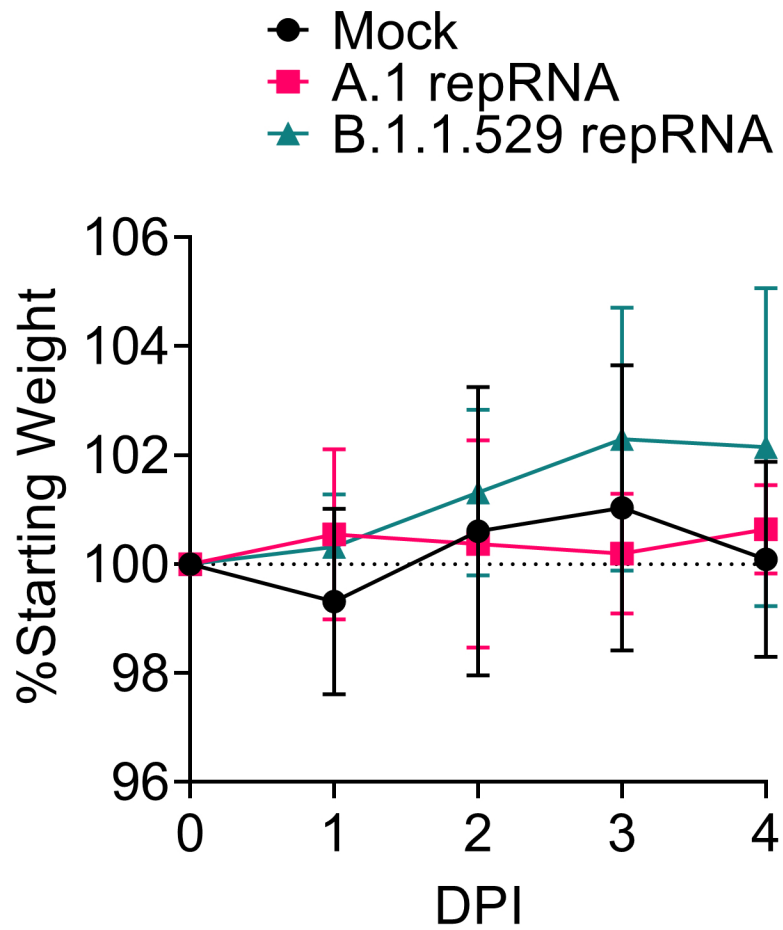

Supplemental Figure 1: Weight loss in B.1.1.529-infected hamsters. Hamsters vaccinated with indicated repRNA vaccine were challenged with 1000 TCID<sub>50</sub> of B.1.1.529 via the IN route four weeks after vaccination. Hamsters were weighed daily. Data presented as mean plus standard deviation. N = 6 per group.
